# Supplementary material for: Long non-coding RNA produced by RNA polymerase V determines boundaries of heterochromatin
Source: PubMed Central journal article supplement (PMC5079748; doi:10.7554/elife.19092), 2016-10-25
Supplement: elife-19092-supp1.pdf [file elife-19092-supp1.pdf]

**Table S1. Oligonucleotides Used in This Study.**

| Transcript           | Primer orientation | Sequence                     |
|----------------------|--------------------|------------------------------|
| ACTIN                | Forward            | GAGAGATTCAGATGCCCAGAAGTC     |
|                      | Reverse            | TGGATTCCAGCAGCTTCCA          |
| PolV_0290            | Forward            | AGCGGCCTAAATGAACATAATCCAGC   |
|                      | Reverse            | TCGTTGCTGGTTGTTCAAACTGAC     |
| PolV_0332            | Forward            | ATGTTTCATCTTGTTGTGGCCAAGG    |
|                      | Reverse            | GTTTCGACAAGGTCTTCCAACTAAAG   |
| PolV_0736, PolV_0737 | Forward            | ACCATATCCATTAATTTCCGGGTTGG   |
|                      | Reverse            | AGTTCTGGGCACAAATATGGAACC     |
| PolV_1057            | Forward            | AATTTGGTGTGTTGGTACATCTCAACTG |
|                      | Reverse            | TTTTACCTTCCCTTTCGAGGTGG      |
| PolV_1468            | Forward            | AAAGCGATTTAGGCGGTGCGACTAGG   |
|                      | Reverse            | ACAGTTGTCTATACGTCGCGTGAGC    |
| PolV_1629            | Forward            | ATCATATCTTGCACCTCGGAAT       |
|                      | Reverse            | CGGGAATTTTTGCCACTAAA         |
| PolV_1702, PolV_1703 | Forward            | TACCCTTGCCCTTTGTATCTTCTCC    |
|                      | Reverse            | GTGAGTGCCAATTTCTGCATCAAG     |
| PolV_1818, PolV_1819 | Forward            | CGAAGGACGAAACTTTTTGG         |
|                      | Reverse            | GGTTTAAACGCAGCCAATGT         |
| PolV_1873, PolV_1874 | Forward            | ATGGCCGAAATGTTGATAATGTGTAATC |
|                      | Reverse            | CATGTTATGCTCAACCGGCGAC       |
| PolV_1927, PolV_1926 | Forward            | GACCCATCTGCGATTCTGCGTTATG    |
|                      | Reverse            | GCGGATGACAGAGGGAGAACCAATC    |
| PolV_2058            | Forward            | GGGCTTCCCTCTGAGTGTTT         |
|                      | Reverse            | CCGAAGCCCAACTAATATCG         |
| PolV_2729            | Forward            | TGGCCCTTTCTCCTTCGACAACAAC    |
|                      | Reverse            | TTTACATTGCAACGCACCCGTCC      |
| PolV_2868            | Forward            | GACGGCACGGTTTCCTTGAATTCTC    |
|                      | Reverse            | GTCAAGTGGGAATGTGACTGCGG      |
| PolV_3151            | Forward            | CCTCACTCAAAGAAACGAGTTCCGAG   |
|                      | Reverse            | AGTGAAAGGGAGAGGAGTTGTTTGTG   |
| PolV_3420            | Forward            | TTATTTTCAGGCCATAAAGAACCCAC   |
|                      | Reverse            | TTGTTGTAACCTGTAACCTCGGACAAAG |
| PolV_3481            | Forward            | TTGTGGTCCAATTTGCTACG         |
|                      | Reverse            | GGCAGCAGGATATTCGGTTA         |
| PolV_3863, PolV_3862 | Forward            | TCTTAATCGAACGCATGTGG         |
|                      | Reverse            | TGCAGCATCTGATCAACAAA         |
| PolV_3926, PolV_3925 | Forward            | CGTGTCTGGTTGAGACCAAATTAGC    |
|                      | Reverse            | ATTAAACTCTGGAATCCGCGAGAAG    |
| PolV_3958            | Forward            | TACCAACGCATCTCAA AATTGAACC   |
|                      | Reverse            | AAAATATTAAAGGGCGCGCTATTCCG   |
| PolV_4213            | Forward            | TTTGAACAGACAATAAACCGACGC     |
|                      | Reverse            | AGTCTTCGACGGACTAACTACGGAC    |
